# Supplementary material
Source: PubMed Central journal article supplement (PMC7808135)
Supplement: ao0c05353_si_001.pdf [file ao0c05353_si_001.pdf]

## Supporting Information

### “Molecular Dynamics Simulation of Atomic Interactions in the Vancomycin Binding Site”

*Olatunde P. Olademehin,<sup>1</sup> Sung Joon Kim<sup>2\*</sup>, and Kevin L. Shuford<sup>1</sup> \**

<sup>1</sup>Department of Chemistry and Biochemistry, Baylor University, Waco, Texas 76706, USA

<sup>2</sup>Department of Chemistry, Howard University, Washington, D.C. 20059, USA

Table S1: Cartesian coordinates for V<sub>N</sub>-Ala complex

---

|   | <u><i>x</i></u> | <u><i>y</i></u> | <u><i>z</i></u> |
|---|-----------------|-----------------|-----------------|
| H | -3.23000000     | -5.21300000     | 2.24900000      |
| H | -3.60800000     | -6.88700000     | 2.65600000      |
| H | -4.91100000     | -5.74000000     | 2.34600000      |
| H | -4.57500000     | -7.21300000     | 0.34800000      |
| H | -3.72600000     | -4.93200000     | -0.97400000     |
| O | -1.58700000     | -6.87900000     | 0.97500000      |
| O | -2.27900000     | -7.09700000     | -1.06100000     |
| C | -2.47200000     | -6.82700000     | 0.12400000      |
| C | -3.90900000     | -6.04000000     | 2.04000000      |
| C | -3.87900000     | -6.40700000     | 0.55700000      |
| N | -4.31200000     | -5.28600000     | -0.24900000     |
| H | -6.42800000     | -4.83800000     | -2.63200000     |
| H | -4.71400000     | -4.42600000     | -2.66400000     |
| H | -5.92000000     | -3.22400000     | -3.12400000     |
| H | -5.05800000     | -2.78500000     | -0.79100000     |
| H | -7.85700000     | -3.58400000     | -0.33300000     |
| O | -6.32700000     | -5.10500000     | 0.81600000      |
| C | -5.52100000     | -4.74000000     | -0.03100000     |
| C | -5.70900000     | -4.04200000     | -2.43700000     |
| C | -5.79600000     | -3.57200000     | -0.97900000     |
| N | -7.12700000     | -3.03100000     | -0.73500000     |
| O | -6.45100000     | -1.05100000     | -1.59000000     |
| C | -7.32300000     | -1.75300000     | -1.10100000     |
| C | -8.74500000     | -1.21200000     | -0.86300000     |
| H | -8.92900000     | -1.14500000     | 0.18900000      |
| H | -8.83600000     | -0.24100000     | -1.30300000     |
| H | -9.45800000     | -1.87400000     | -1.30800000     |
| N | -3.38600000     | -11.86300000    | -0.17800000     |
| C | -2.78200000     | -12.15600000    | 1.11600000      |
| C | -2.79600000     | -10.65900000    | -0.75200000     |
| C | -1.28700000     | -10.83300000    | -0.93600000     |
| O | -0.82800000     | -11.67700000    | -1.69500000     |
| C | -3.40500000     | -10.31500000    | -2.11000000     |

|    |             |              |             |
|----|-------------|--------------|-------------|
| C  | -4.92700000 | -10.19300000 | -2.05900000 |
| C  | -5.35800000 | -9.01500000  | -1.18700000 |
| C  | -5.49100000 | -10.04500000 | -3.47300000 |
| H  | -3.22600000 | -12.66500000 | -0.82200000 |
| H  | -3.23700000 | -13.05800000 | 1.52500000  |
| H  | -1.71100000 | -12.31000000 | 0.98200000  |
| H  | -2.95500000 | -11.31600000 | 1.78800000  |
| H  | -2.97500000 | -9.84200000  | -0.05500000 |
| H  | -3.13300000 | -11.09000000 | -2.82700000 |
| H  | -2.97500000 | -9.38300000  | -2.47800000 |
| H  | -5.32500000 | -11.10800000 | -1.62000000 |
| H  | -5.00000000 | -8.07400000  | -1.60600000 |
| H  | -6.44400000 | -8.95900000  | -1.11800000 |
| H  | -4.96000000 | -9.11200000  | -0.17700000 |
| H  | -5.11300000 | -9.14100000  | -3.94900000 |
| H  | -5.21000000 | -10.89600000 | -4.09400000 |
| H  | -6.57900000 | -9.98700000  | -3.45300000 |
| N  | -0.54900000 | -9.98300000  | -0.19800000 |
| C  | 0.89700000  | -10.07300000 | -0.31800000 |
| C  | 1.42700000  | -8.95900000  | -1.24400000 |
| O  | 2.44200000  | -9.14200000  | -1.90600000 |
| C  | 1.56200000  | -10.09900000 | 1.06700000  |
| O  | 1.16300000  | -11.25100000 | 1.76500000  |
| C  | 1.17700000  | -8.89300000  | 1.85900000  |
| C  | 2.03000000  | -7.73400000  | 1.85500000  |
| C  | -0.07200000 | -8.86700000  | 2.58200000  |
| C  | 1.59200000  | -6.53800000  | 2.51300000  |
| Cl | 2.60200000  | -5.13500000  | 2.49000000  |
| C  | -0.49900000 | -7.66000000  | 3.24400000  |
| C  | 0.31700000  | -6.47800000  | 3.16700000  |
| O  | -0.15600000 | -5.24000000  | 3.60000000  |
| H  | -0.98100000 | -9.31000000  | 0.40200000  |
| H  | 1.09400000  | -11.02200000 | -0.81900000 |
| H  | 2.64700000  | -10.13300000 | 0.96600000  |
| H  | 1.60800000  | -11.23000000 | 2.60200000  |
| H  | 2.98000000  | -7.75800000  | 1.34300000  |
| H  | -0.70000000 | -9.74500000  | 2.60800000  |
| H  | -1.44700000 | -7.62900000  | 3.76100000  |
| N  | 0.71300000  | -7.80600000  | -1.28100000 |
| C  | 1.21300000  | -6.79600000  | -2.20600000 |
| C  | 1.10600000  | -5.35800000  | -1.67600000 |
| O  | 2.09600000  | -4.72200000  | -1.33100000 |
| C  | 0.42700000  | -6.89500000  | -3.51300000 |
| C  | 0.42200000  | -8.33600000  | -4.02500000 |
| O  | 1.44000000  | -8.88700000  | -4.42600000 |
| N  | -0.80000000 | -8.89800000  | -3.98200000 |
| H  | -0.12300000 | -7.64400000  | -0.75700000 |

|   |             |             |             |
|---|-------------|-------------|-------------|
| H | 2.25900000  | -7.02800000 | -2.39600000 |
| H | -0.60500000 | -6.57900000 | -3.35300000 |
| H | 0.85400000  | -6.24600000 | -4.27800000 |
| H | -1.58300000 | -8.37900000 | -3.64100000 |
| H | -0.95200000 | -9.83900000 | -4.28700000 |
| N | -0.15300000 | -4.88100000 | -1.67300000 |
| C | -0.35500000 | -3.50700000 | -1.23100000 |
| C | -1.51400000 | -2.86100000 | -2.00900000 |
| O | -2.51300000 | -3.48600000 | -2.34300000 |
| C | -0.59800000 | -3.35400000 | 0.25800000  |
| C | -1.22200000 | -2.17600000 | 0.78900000  |
| C | -1.45800000 | -1.98500000 | 2.21400000  |
| C | -1.07500000 | -3.06100000 | 3.10100000  |
| O | -1.33300000 | -3.00100000 | 4.45700000  |
| C | -0.45300000 | -4.26500000 | 2.61100000  |
| C | -0.21300000 | -4.37800000 | 1.17600000  |
| H | -0.91100000 | -5.49100000 | -1.90800000 |
| H | 0.56600000  | -2.98300000 | -1.48700000 |
| H | -1.56400000 | -1.42100000 | 0.09400000  |
| H | 0.26000000  | -5.26800000 | 0.79200000  |
| N | -1.28500000 | -1.55600000 | -2.25400000 |
| C | -2.30700000 | -0.76600000 | -2.90700000 |
| C | -1.92000000 | 0.72200000  | -2.94900000 |
| O | -0.75700000 | 1.02800000  | -3.16900000 |
| C | -2.74700000 | -1.17900000 | -4.27700000 |
| C | -4.13800000 | -1.45900000 | -4.44400000 |
| C | -4.71500000 | -1.70000000 | -5.71300000 |
| C | -3.87100000 | -1.71000000 | -6.86900000 |
| O | -4.41200000 | -1.96300000 | -8.11300000 |
| C | -2.45300000 | -1.45100000 | -6.74100000 |
| C | -1.89200000 | -1.18000000 | -5.43800000 |
| H | -0.42800000 | -1.13200000 | -1.96200000 |
| H | -3.13300000 | -0.91600000 | -2.22300000 |
| H | -4.77600000 | -1.45800000 | -3.57400000 |
| H | -5.34500000 | -2.11000000 | -8.02700000 |
| H | -1.81900000 | -1.45700000 | -7.61600000 |
| H | -0.83900000 | -0.96300000 | -5.33600000 |
| N | -2.89100000 | 1.65500000  | -2.74800000 |
| C | -4.31200000 | 1.44300000  | -2.47900000 |
| O | -2.02900000 | -0.82000000 | 2.79700000  |
| C | -2.25800000 | 1.37200000  | 1.64300000  |
| C | -3.93600000 | -0.42600000 | 1.33200000  |
| C | -2.74500000 | 0.05400000  | 1.96600000  |
| C | -4.07000000 | 1.62700000  | -0.06400000 |
| C | -2.91700000 | 2.15900000  | 0.62500000  |
| C | -4.60100000 | 0.34900000  | 0.32800000  |
| C | -4.69400000 | 2.29200000  | -1.26400000 |

|    |              |             |             |
|----|--------------|-------------|-------------|
| Cl | -4.55800000  | -1.98400000 | 1.75500000  |
| O  | -5.04200000  | 2.67300000  | -4.44900000 |
| C  | -5.14900000  | 1.67100000  | -3.75100000 |
| O  | -4.25700000  | 3.62400000  | -1.41700000 |
| H  | -2.59000000  | 2.60900000  | -2.78300000 |
| H  | -4.46300000  | 0.40400000  | -2.21400000 |
| H  | -1.38000000  | 1.74800000  | 2.14200000  |
| H  | -2.53100000  | 3.13400000  | 0.36200000  |
| H  | -5.48000000  | -0.03900000 | -0.15500000 |
| H  | -5.77600000  | 2.26800000  | -1.15800000 |
| H  | -4.66800000  | 4.25600000  | -0.68600000 |
| N  | -5.97700000  | 0.62600000  | -3.97700000 |
| O  | -5.58200000  | -4.21800000 | -6.36900000 |
| C  | -6.55800000  | -3.28200000 | -6.09200000 |
| C  | -6.17900000  | -1.94500000 | -5.77200000 |
| C  | -7.93600000  | -3.66900000 | -6.11900000 |
| C  | -8.95700000  | -2.70500000 | -5.83200000 |
| O  | -10.28700000 | -3.07400000 | -5.85400000 |
| C  | -8.58600000  | -1.35600000 | -5.51500000 |
| C  | -7.19500000  | -0.94800000 | -5.47600000 |
| C  | -6.83800000  | 0.50800000  | -5.12300000 |
| C  | -8.05900000  | 1.40100000  | -4.81900000 |
| O  | -8.62700000  | 1.96300000  | -5.75400000 |
| O  | -8.41400000  | 1.52000000  | -3.64100000 |
| H  | -5.97500000  | -0.12600000 | -3.32400000 |
| H  | -6.23600000  | 0.93300000  | -5.92100000 |
| H  | -4.72800000  | -3.81200000 | -6.30700000 |
| H  | -8.18500000  | -4.69700000 | -6.32800000 |
| H  | -10.82600000 | -2.32400000 | -5.64100000 |
| H  | -9.35500000  | -0.63600000 | -5.27800000 |
| C  | -1.08900000  | -1.98300000 | 6.56800000  |
| C  | -0.26500000  | -1.02300000 | 7.41900000  |
| C  | 1.22200000   | -1.28100000 | 7.20500000  |
| C  | 1.55700000   | -1.31200000 | 5.71200000  |
| C  | 3.02200000   | -1.70800000 | 5.49800000  |
| C  | -0.63600000  | -1.96700000 | 5.10700000  |
| O  | -2.45400000  | -1.64400000 | 6.65600000  |
| O  | -0.59500000  | -1.22600000 | 8.77000000  |
| O  | 1.96400000   | -0.24700000 | 7.80100000  |
| O  | 0.74300000   | -2.26000000 | 5.05700000  |
| O  | 3.28900000   | -2.93400000 | 6.13000000  |
| H  | -0.95700000  | -2.99500000 | 6.95000000  |
| H  | -0.50300000  | 0.00700000  | 7.16200000  |
| H  | 1.51400000   | -2.22200000 | 7.67100000  |
| H  | 1.36100000   | -0.32400000 | 5.29100000  |
| H  | 3.69200000   | -0.95900000 | 5.91800000  |
| H  | 3.26200000   | -1.82400000 | 4.44000000  |

|   |             |             |            |
|---|-------------|-------------|------------|
| H | -0.83600000 | -1.00800000 | 4.63000000 |
| H | -1.25500000 | -0.58100000 | 8.98900000 |
| H | 2.20300000  | -0.54700000 | 8.66700000 |
| H | 4.20300000  | -3.12900000 | 5.97100000 |
| C | -3.12500000 | -2.41200000 | 7.62800000 |
| C | -4.56400000 | -1.92000000 | 7.81700000 |
| C | -5.43700000 | -2.19300000 | 6.59100000 |
| N | -6.83600000 | -1.97400000 | 6.94000000 |
| C | -5.06700000 | -1.24400000 | 5.45100000 |
| C | -5.24800000 | -3.64400000 | 6.15300000 |
| O | -5.93000000 | -3.86500000 | 4.94400000 |
| C | -3.76200000 | -3.94800000 | 5.98100000 |
| O | -3.13200000 | -3.76200000 | 7.22600000 |
| C | -3.51200000 | -5.37600000 | 5.49300000 |
| H | -2.58600000 | -2.32500000 | 8.57100000 |
| H | -4.99600000 | -2.43400000 | 8.67500000 |
| H | -4.57200000 | -0.85600000 | 8.05500000 |
| H | -7.41500000 | -2.57800000 | 6.39200000 |
| H | -4.02800000 | -1.37600000 | 5.15000000 |
| H | -5.69400000 | -1.42500000 | 4.57700000 |
| H | -5.20300000 | -0.20600000 | 5.75200000 |
| H | -5.67300000 | -4.31600000 | 6.89800000 |
| H | -6.78300000 | -4.21200000 | 5.17200000 |
| H | -3.34500000 | -3.24500000 | 5.26400000 |
| H | -3.98700000 | -5.54500000 | 4.52700000 |
| H | -2.44500000 | -5.56700000 | 5.38300000 |
| H | -3.91400000 | -6.10300000 | 6.19800000 |
| H | -6.97200000 | -2.17200000 | 7.91100000 |

Table S2: Cartesian coordinates for V<sub>N</sub>-Lac complex

---

|   | <u><i>x</i></u> | <u><i>y</i></u> | <u><i>z</i></u> |
|---|-----------------|-----------------|-----------------|
| H | -3.23000000     | -5.21300000     | 2.24900000      |
| H | -3.60800000     | -6.88700000     | 2.65600000      |
| H | -4.91100000     | -5.74000000     | 2.34600000      |
| H | -4.57500000     | -7.21300000     | 0.34800000      |
| O | -1.58700000     | -6.87900000     | 0.97500000      |
| O | -2.27900000     | -7.09700000     | -1.06100000     |
| C | -2.47200000     | -6.82700000     | 0.12400000      |
| C | -3.90900000     | -6.04000000     | 2.04000000      |
| C | -3.87900000     | -6.40700000     | 0.55700000      |
| O | -4.31200000     | -5.28600000     | -0.24900000     |
| H | -6.42800000     | -4.83800000     | -2.63200000     |
| H | -4.71400000     | -4.42600000     | -2.66400000     |
| H | -5.92000000     | -3.22400000     | -3.12400000     |

|    |             |              |             |
|----|-------------|--------------|-------------|
| H  | -5.05800000 | -2.78500000  | -0.79100000 |
| H  | -7.85700000 | -3.58400000  | -0.33300000 |
| O  | -6.32700000 | -5.10500000  | 0.81600000  |
| C  | -5.52100000 | -4.74000000  | -0.03100000 |
| C  | -5.70900000 | -4.04200000  | -2.43700000 |
| C  | -5.79600000 | -3.57200000  | -0.97900000 |
| N  | -7.12700000 | -3.03100000  | -0.73500000 |
| O  | -6.45100000 | -1.05100000  | -1.59000000 |
| C  | -7.32300000 | -1.75300000  | -1.10100000 |
| C  | -8.74500000 | -1.21200000  | -0.86300000 |
| H  | -8.92900000 | -1.14500000  | 0.18900000  |
| H  | -8.83600000 | -0.24100000  | -1.30300000 |
| H  | -9.45800000 | -1.87400000  | -1.30800000 |
| N  | -3.38600000 | -11.86300000 | -0.17800000 |
| C  | -2.78200000 | -12.15600000 | 1.11600000  |
| C  | -2.79600000 | -10.65900000 | -0.75200000 |
| C  | -1.28700000 | -10.83300000 | -0.93600000 |
| O  | -0.82800000 | -11.67700000 | -1.69500000 |
| C  | -3.40500000 | -10.31500000 | -2.11000000 |
| C  | -4.92700000 | -10.19300000 | -2.05900000 |
| C  | -5.35800000 | -9.01500000  | -1.18700000 |
| C  | -5.49100000 | -10.04500000 | -3.47300000 |
| H  | -3.22600000 | -12.66500000 | -0.82200000 |
| H  | -3.23700000 | -13.05800000 | 1.52500000  |
| H  | -1.71100000 | -12.31000000 | 0.98200000  |
| H  | -2.95500000 | -11.31600000 | 1.78800000  |
| H  | -2.97500000 | -9.84200000  | -0.05500000 |
| H  | -3.13300000 | -11.09000000 | -2.82700000 |
| H  | -2.97500000 | -9.38300000  | -2.47800000 |
| H  | -5.32500000 | -11.10800000 | -1.62000000 |
| H  | -5.00000000 | -8.07400000  | -1.60600000 |
| H  | -6.44400000 | -8.95900000  | -1.11800000 |
| H  | -4.96000000 | -9.11200000  | -0.17700000 |
| H  | -5.11300000 | -9.14100000  | -3.94900000 |
| H  | -5.21000000 | -10.89600000 | -4.09400000 |
| H  | -6.57900000 | -9.98700000  | -3.45300000 |
| N  | -0.54900000 | -9.98300000  | -0.19800000 |
| C  | 0.89700000  | -10.07300000 | -0.31800000 |
| C  | 1.42700000  | -8.95900000  | -1.24400000 |
| O  | 2.44200000  | -9.14200000  | -1.90600000 |
| C  | 1.56200000  | -10.09900000 | 1.06700000  |
| O  | 1.16300000  | -11.25100000 | 1.76500000  |
| C  | 1.17700000  | -8.89300000  | 1.85900000  |
| C  | 2.03000000  | -7.73400000  | 1.85500000  |
| C  | -0.07200000 | -8.86700000  | 2.58200000  |
| C  | 1.59200000  | -6.53800000  | 2.51300000  |
| Cl | 2.60200000  | -5.13500000  | 2.49000000  |

|   |             |              |             |
|---|-------------|--------------|-------------|
| C | -0.49900000 | -7.66000000  | 3.24400000  |
| C | 0.31700000  | -6.47800000  | 3.16700000  |
| O | -0.15600000 | -5.24000000  | 3.60000000  |
| H | -0.98100000 | -9.31000000  | 0.40200000  |
| H | 1.09400000  | -11.02200000 | -0.81900000 |
| H | 2.64700000  | -10.13300000 | 0.96600000  |
| H | 1.60800000  | -11.23000000 | 2.60200000  |
| H | 2.98000000  | -7.75800000  | 1.34300000  |
| H | -0.70000000 | -9.74500000  | 2.60800000  |
| H | -1.44700000 | -7.62900000  | 3.76100000  |
| N | 0.71300000  | -7.80600000  | -1.28100000 |
| C | 1.21300000  | -6.79600000  | -2.20600000 |
| C | 1.10600000  | -5.35800000  | -1.67600000 |
| O | 2.09600000  | -4.72200000  | -1.33100000 |
| C | 0.42700000  | -6.89500000  | -3.51300000 |
| C | 0.42200000  | -8.33600000  | -4.02500000 |
| O | 1.44000000  | -8.88700000  | -4.42600000 |
| N | -0.80000000 | -8.89800000  | -3.98200000 |
| H | -0.12300000 | -7.64400000  | -0.75700000 |
| H | 2.25900000  | -7.02800000  | -2.39600000 |
| H | -0.60500000 | -6.57900000  | -3.35300000 |
| H | 0.85400000  | -6.24600000  | -4.27800000 |
| H | -1.58300000 | -8.37900000  | -3.64100000 |
| H | -0.95200000 | -9.83900000  | -4.28700000 |
| N | -0.15300000 | -4.88100000  | -1.67300000 |
| C | -0.35500000 | -3.50700000  | -1.23100000 |
| C | -1.51400000 | -2.86100000  | -2.00900000 |
| O | -2.51300000 | -3.48600000  | -2.34300000 |
| C | -0.59800000 | -3.35400000  | 0.25800000  |
| C | -1.22200000 | -2.17600000  | 0.78900000  |
| C | -1.45800000 | -1.98500000  | 2.21400000  |
| C | -1.07500000 | -3.06100000  | 3.10100000  |
| O | -1.33300000 | -3.00100000  | 4.45700000  |
| C | -0.45300000 | -4.26500000  | 2.61100000  |
| C | -0.21300000 | -4.37800000  | 1.17600000  |
| H | -0.91100000 | -5.49100000  | -1.90800000 |
| H | 0.56600000  | -2.98300000  | -1.48700000 |
| H | -1.56400000 | -1.42100000  | 0.09400000  |
| H | 0.26000000  | -5.26800000  | 0.79200000  |
| N | -1.28500000 | -1.55600000  | -2.25400000 |
| C | -2.30700000 | -0.76600000  | -2.90700000 |
| C | -1.92000000 | 0.72200000   | -2.94900000 |
| O | -0.75700000 | 1.02800000   | -3.16900000 |
| C | -2.74700000 | -1.17900000  | -4.27700000 |
| C | -4.13800000 | -1.45900000  | -4.44400000 |
| C | -4.71500000 | -1.70000000  | -5.71300000 |
| C | -3.87100000 | -1.71000000  | -6.86900000 |

|    |              |             |             |
|----|--------------|-------------|-------------|
| O  | -4.41200000  | -1.96300000 | -8.11300000 |
| C  | -2.45300000  | -1.45100000 | -6.74100000 |
| C  | -1.89200000  | -1.18000000 | -5.43800000 |
| H  | -0.42800000  | -1.13200000 | -1.96200000 |
| H  | -3.13300000  | -0.91600000 | -2.22300000 |
| H  | -4.77600000  | -1.45800000 | -3.57400000 |
| H  | -5.34500000  | -2.11000000 | -8.02700000 |
| H  | -1.81900000  | -1.45700000 | -7.61600000 |
| H  | -0.83900000  | -0.96300000 | -5.33600000 |
| N  | -2.89100000  | 1.65500000  | -2.74800000 |
| C  | -4.31200000  | 1.44300000  | -2.47900000 |
| O  | -2.02900000  | -0.82000000 | 2.79700000  |
| C  | -2.25800000  | 1.37200000  | 1.64300000  |
| C  | -3.93600000  | -0.42600000 | 1.33200000  |
| C  | -2.74500000  | 0.05400000  | 1.96600000  |
| C  | -4.07000000  | 1.62700000  | -0.06400000 |
| C  | -2.91700000  | 2.15900000  | 0.62500000  |
| C  | -4.60100000  | 0.34900000  | 0.32800000  |
| C  | -4.69400000  | 2.29200000  | -1.26400000 |
| Cl | -4.55800000  | -1.98400000 | 1.75500000  |
| O  | -5.04200000  | 2.67300000  | -4.44900000 |
| C  | -5.14900000  | 1.67100000  | -3.75100000 |
| O  | -4.25700000  | 3.62400000  | -1.41700000 |
| H  | -2.59000000  | 2.60900000  | -2.78300000 |
| H  | -4.46300000  | 0.40400000  | -2.21400000 |
| H  | -1.38000000  | 1.74800000  | 2.14200000  |
| H  | -2.53100000  | 3.13400000  | 0.36200000  |
| H  | -5.48000000  | -0.03900000 | -0.15500000 |
| H  | -5.77600000  | 2.26800000  | -1.15800000 |
| H  | -4.66800000  | 4.25600000  | -0.68600000 |
| N  | -5.97700000  | 0.62600000  | -3.97700000 |
| O  | -5.58200000  | -4.21800000 | -6.36900000 |
| C  | -6.55800000  | -3.28200000 | -6.09200000 |
| C  | -6.17900000  | -1.94500000 | -5.77200000 |
| C  | -7.93600000  | -3.66900000 | -6.11900000 |
| C  | -8.95700000  | -2.70500000 | -5.83200000 |
| O  | -10.28700000 | -3.07400000 | -5.85400000 |
| C  | -8.58600000  | -1.35600000 | -5.51500000 |
| C  | -7.19500000  | -0.94800000 | -5.47600000 |
| C  | -6.83800000  | 0.50800000  | -5.12300000 |
| C  | -8.05900000  | 1.40100000  | -4.81900000 |
| O  | -8.62700000  | 1.96300000  | -5.75400000 |
| O  | -8.41400000  | 1.52000000  | -3.64100000 |
| H  | -5.97500000  | -0.12600000 | -3.32400000 |
| H  | -6.23600000  | 0.93300000  | -5.92100000 |
| H  | -4.72800000  | -3.81200000 | -6.30700000 |
| H  | -8.18500000  | -4.69700000 | -6.32800000 |



|   |              |             |             |
|---|--------------|-------------|-------------|
| H | -10.82600000 | -2.32400000 | -5.64100000 |
| H | -9.35500000  | -0.63600000 | -5.27800000 |
| C | -1.08900000  | -1.98300000 | 6.56800000  |
| C | -0.26500000  | -1.02300000 | 7.41900000  |
| C | 1.22200000   | -1.28100000 | 7.20500000  |
| C | 1.55700000   | -1.31200000 | 5.71200000  |
| C | 3.02200000   | -1.70800000 | 5.49800000  |
| C | -0.63600000  | -1.96700000 | 5.10700000  |
| O | -2.45400000  | -1.64400000 | 6.65600000  |
| O | -0.59500000  | -1.22600000 | 8.77000000  |
| O | 1.96400000   | -0.24700000 | 7.80100000  |
| O | 0.74300000   | -2.26000000 | 5.05700000  |
| O | 3.28900000   | -2.93400000 | 6.13000000  |
| H | -0.95700000  | -2.99500000 | 6.95000000  |
| H | -0.50300000  | 0.00700000  | 7.16200000  |
| H | 1.51400000   | -2.22200000 | 7.67100000  |
| H | 1.36100000   | -0.32400000 | 5.29100000  |
| H | 3.69200000   | -0.95900000 | 5.91800000  |
| H | 3.26200000   | -1.82400000 | 4.44000000  |
| H | -0.83600000  | -1.00800000 | 4.63000000  |
| H | -1.25500000  | -0.58100000 | 8.98900000  |
| H | 2.20300000   | -0.54700000 | 8.66700000  |
| H | 4.20300000   | -3.12900000 | 5.97100000  |
| C | -3.12500000  | -2.41200000 | 7.62800000  |
| C | -4.56400000  | -1.92000000 | 7.81700000  |
| C | -5.43700000  | -2.19300000 | 6.59100000  |
| N | -6.83600000  | -1.97400000 | 6.94000000  |
| C | -5.06700000  | -1.24400000 | 5.45100000  |
| C | -5.24800000  | -3.64400000 | 6.15300000  |
| O | -5.93000000  | -3.86500000 | 4.94400000  |
| C | -3.76200000  | -3.94800000 | 5.98100000  |
| O | -3.13200000  | -3.76200000 | 7.22600000  |
| C | -3.51200000  | -5.37600000 | 5.49300000  |
| H | -2.58600000  | -2.32500000 | 8.57100000  |
| H | -4.99600000  | -2.43400000 | 8.67500000  |
| H | -4.57200000  | -0.85600000 | 8.05500000  |
| H | -7.41500000  | -2.57800000 | 6.39200000  |
| H | -4.02800000  | -1.37600000 | 5.15000000  |
| H | -5.69400000  | -1.42500000 | 4.57700000  |
| H | -5.20300000  | -0.20600000 | 5.75200000  |
| H | -5.67300000  | -4.31600000 | 6.89800000  |
| H | -6.78300000  | -4.21200000 | 5.17200000  |
| H | -3.34500000  | -3.24500000 | 5.26400000  |
| H | -3.98700000  | -5.54500000 | 4.52700000  |
| H | -2.44500000  | -5.56700000 | 5.38300000  |
| H | -3.91400000  | -6.10300000 | 6.19800000  |
| H | -6.97200000  | -2.17200000 | 7.91100000  |

Table S3: Cartesian coordinates for V<sub>D</sub>-Lac complex

|   | <i>x</i>    | <i>y</i>     | <i>z</i>    |
|---|-------------|--------------|-------------|
| H | -3.23000000 | -5.21300000  | 2.24900000  |
| H | -3.60800000 | -6.88700000  | 2.65600000  |
| H | -4.91100000 | -5.74000000  | 2.34600000  |
| H | -4.57500000 | -7.21300000  | 0.34800000  |
| O | -1.58700000 | -6.87900000  | 0.97500000  |
| O | -2.27900000 | -7.09700000  | -1.06100000 |
| C | -2.47200000 | -6.82700000  | 0.12400000  |
| C | -3.90900000 | -6.04000000  | 2.04000000  |
| C | -3.87900000 | -6.40700000  | 0.55700000  |
| O | -4.31200000 | -5.28600000  | -0.24900000 |
| H | -6.42800000 | -4.83800000  | -2.63200000 |
| H | -4.71400000 | -4.42600000  | -2.66400000 |
| H | -5.92000000 | -3.22400000  | -3.12400000 |
| H | -5.05800000 | -2.78500000  | -0.79100000 |
| H | -7.85700000 | -3.58400000  | -0.33300000 |
| O | -6.32700000 | -5.10500000  | 0.81600000  |
| C | -5.52100000 | -4.74000000  | -0.03100000 |
| C | -5.70900000 | -4.04200000  | -2.43700000 |
| C | -5.79600000 | -3.57200000  | -0.97900000 |
| N | -7.12700000 | -3.03100000  | -0.73500000 |
| O | -6.45100000 | -1.05100000  | -1.59000000 |
| C | -7.32300000 | -1.75300000  | -1.10100000 |
| C | -8.74500000 | -1.21200000  | -0.86300000 |
| H | -8.92900000 | -1.14500000  | 0.18900000  |
| H | -8.83600000 | -0.24100000  | -1.30300000 |
| H | -9.45800000 | -1.87400000  | -1.30800000 |
| N | -3.38600000 | -11.86300000 | -0.17800000 |
| C | -2.78200000 | -12.15600000 | 1.11600000  |
| C | -2.79600000 | -10.65900000 | -0.75200000 |
| C | -1.28700000 | -10.83300000 | -0.93600000 |
| O | -0.82800000 | -11.67700000 | -1.69500000 |
| C | -3.40500000 | -10.31500000 | -2.11000000 |
| C | -4.92700000 | -10.19300000 | -2.05900000 |
| C | -5.35800000 | -9.01500000  | -1.18700000 |
| C | -5.49100000 | -10.04500000 | -3.47300000 |
| H | -3.22600000 | -12.66500000 | -0.82200000 |
| H | -3.23700000 | -13.05800000 | 1.52500000  |
| H | -1.71100000 | -12.31000000 | 0.98200000  |
| H | -2.95500000 | -11.31600000 | 1.78800000  |
| H | -2.97500000 | -9.84200000  | -0.05500000 |
| H | -3.13300000 | -11.09000000 | -2.82700000 |

|    |             |              |             |
|----|-------------|--------------|-------------|
| H  | -2.97500000 | -9.38300000  | -2.47800000 |
| H  | -5.32500000 | -11.10800000 | -1.62000000 |
| H  | -5.00000000 | -8.07400000  | -1.60600000 |
| H  | -6.44400000 | -8.95900000  | -1.11800000 |
| H  | -4.96000000 | -9.11200000  | -0.17700000 |
| H  | -5.11300000 | -9.14100000  | -3.94900000 |
| H  | -5.21000000 | -10.89600000 | -4.09400000 |
| H  | -6.57900000 | -9.98700000  | -3.45300000 |
| N  | -0.54900000 | -9.98300000  | -0.19800000 |
| C  | 0.89700000  | -10.07300000 | -0.31800000 |
| C  | 1.42700000  | -8.95900000  | -1.24400000 |
| O  | 2.44200000  | -9.14200000  | -1.90600000 |
| C  | 1.56200000  | -10.09900000 | 1.06700000  |
| O  | 1.16300000  | -11.25100000 | 1.76500000  |
| C  | 1.17700000  | -8.89300000  | 1.85900000  |
| C  | 2.03000000  | -7.73400000  | 1.85500000  |
| C  | -0.07200000 | -8.86700000  | 2.58200000  |
| C  | 1.59200000  | -6.53800000  | 2.51300000  |
| C1 | 2.60200000  | -5.13500000  | 2.49000000  |
| C  | -0.49900000 | -7.66000000  | 3.24400000  |
| C  | 0.31700000  | -6.47800000  | 3.16700000  |
| O  | -0.15600000 | -5.24000000  | 3.60000000  |
| H  | -0.98100000 | -9.31000000  | 0.40200000  |
| H  | 1.09400000  | -11.02200000 | -0.81900000 |
| H  | 2.64700000  | -10.13300000 | 0.96600000  |
| H  | 1.60800000  | -11.23000000 | 2.60200000  |
| H  | 2.98000000  | -7.75800000  | 1.34300000  |
| H  | -0.70000000 | -9.74500000  | 2.60800000  |
| H  | -1.44700000 | -7.62900000  | 3.76100000  |
| N  | 0.71300000  | -7.80600000  | -1.28100000 |
| C  | 1.21300000  | -6.79600000  | -2.20600000 |
| C  | 1.10600000  | -5.35800000  | -1.67600000 |
| O  | 2.09600000  | -4.72200000  | -1.33100000 |
| C  | 0.42700000  | -6.89500000  | -3.51300000 |
| C  | 0.42200000  | -8.33600000  | -4.02500000 |
| O  | 1.44000000  | -8.88700000  | -4.42600000 |
| H  | -0.12300000 | -7.64400000  | -0.75700000 |
| H  | 2.25900000  | -7.02800000  | -2.39600000 |
| H  | -0.60500000 | -6.57900000  | -3.35300000 |
| H  | 0.85400000  | -6.24600000  | -4.27800000 |
| N  | -0.15300000 | -4.88100000  | -1.67300000 |
| C  | -0.35500000 | -3.50700000  | -1.23100000 |
| C  | -1.51400000 | -2.86100000  | -2.00900000 |
| O  | -2.51300000 | -3.48600000  | -2.34300000 |
| C  | -0.59800000 | -3.35400000  | 0.25800000  |
| C  | -1.22200000 | -2.17600000  | 0.78900000  |
| C  | -1.45800000 | -1.98500000  | 2.21400000  |

|    |             |             |             |
|----|-------------|-------------|-------------|
| C  | -1.07500000 | -3.06100000 | 3.10100000  |
| O  | -1.33300000 | -3.00100000 | 4.45700000  |
| C  | -0.45300000 | -4.26500000 | 2.61100000  |
| C  | -0.21300000 | -4.37800000 | 1.17600000  |
| H  | -0.91100000 | -5.49100000 | -1.90800000 |
| H  | 0.56600000  | -2.98300000 | -1.48700000 |
| H  | -1.56400000 | -1.42100000 | 0.09400000  |
| H  | 0.26000000  | -5.26800000 | 0.79200000  |
| N  | -1.28500000 | -1.55600000 | -2.25400000 |
| C  | -2.30700000 | -0.76600000 | -2.90700000 |
| C  | -1.92000000 | 0.72200000  | -2.94900000 |
| O  | -0.75700000 | 1.02800000  | -3.16900000 |
| C  | -2.74700000 | -1.17900000 | -4.27700000 |
| C  | -4.13800000 | -1.45900000 | -4.44400000 |
| C  | -4.71500000 | -1.70000000 | -5.71300000 |
| C  | -3.87100000 | -1.71000000 | -6.86900000 |
| O  | -4.41200000 | -1.96300000 | -8.11300000 |
| C  | -2.45300000 | -1.45100000 | -6.74100000 |
| C  | -1.89200000 | -1.18000000 | -5.43800000 |
| H  | -0.42800000 | -1.13200000 | -1.96200000 |
| H  | -3.13300000 | -0.91600000 | -2.22300000 |
| H  | -4.77600000 | -1.45800000 | -3.57400000 |
| H  | -5.34500000 | -2.11000000 | -8.02700000 |
| H  | -1.81900000 | -1.45700000 | -7.61600000 |
| H  | -0.83900000 | -0.96300000 | -5.33600000 |
| N  | -2.89100000 | 1.65500000  | -2.74800000 |
| C  | -4.31200000 | 1.44300000  | -2.47900000 |
| O  | -2.02900000 | -0.82000000 | 2.79700000  |
| C  | -2.25800000 | 1.37200000  | 1.64300000  |
| C  | -3.93600000 | -0.42600000 | 1.33200000  |
| C  | -2.74500000 | 0.05400000  | 1.96600000  |
| C  | -4.07000000 | 1.62700000  | -0.06400000 |
| C  | -2.91700000 | 2.15900000  | 0.62500000  |
| C  | -4.60100000 | 0.34900000  | 0.32800000  |
| C  | -4.69400000 | 2.29200000  | -1.26400000 |
| Cl | -4.55800000 | -1.98400000 | 1.75500000  |
| O  | -5.04200000 | 2.67300000  | -4.44900000 |
| C  | -5.14900000 | 1.67100000  | -3.75100000 |
| O  | -4.25700000 | 3.62400000  | -1.41700000 |
| H  | -2.59000000 | 2.60900000  | -2.78300000 |
| H  | -4.46300000 | 0.40400000  | -2.21400000 |
| H  | -1.38000000 | 1.74800000  | 2.14200000  |
| H  | -2.53100000 | 3.13400000  | 0.36200000  |
| H  | -5.48000000 | -0.03900000 | -0.15500000 |
| H  | -5.77600000 | 2.26800000  | -1.15800000 |
| H  | -4.66800000 | 4.25600000  | -0.68600000 |
| N  | -5.97700000 | 0.62600000  | -3.97700000 |

|   |              |             |             |
|---|--------------|-------------|-------------|
| O | -5.58200000  | -4.21800000 | -6.36900000 |
| C | -6.55800000  | -3.28200000 | -6.09200000 |
| C | -6.17900000  | -1.94500000 | -5.77200000 |
| C | -7.93600000  | -3.66900000 | -6.11900000 |
| C | -8.95700000  | -2.70500000 | -5.83200000 |
| O | -10.28700000 | -3.07400000 | -5.85400000 |
| C | -8.58600000  | -1.35600000 | -5.51500000 |
| C | -7.19500000  | -0.94800000 | -5.47600000 |
| C | -6.83800000  | 0.50800000  | -5.12300000 |
| C | -8.05900000  | 1.40100000  | -4.81900000 |
| O | -8.62700000  | 1.96300000  | -5.75400000 |
| O | -8.41400000  | 1.52000000  | -3.64100000 |
| H | -5.97500000  | -0.12600000 | -3.32400000 |
| H | -6.23600000  | 0.93300000  | -5.92100000 |
| H | -4.72800000  | -3.81200000 | -6.30700000 |
| H | -8.18500000  | -4.69700000 | -6.32800000 |
| H | -10.82600000 | -2.32400000 | -5.64100000 |
| H | -9.35500000  | -0.63600000 | -5.27800000 |
| C | -1.08900000  | -1.98300000 | 6.56800000  |
| C | -0.26500000  | -1.02300000 | 7.41900000  |
| C | 1.22200000   | -1.28100000 | 7.20500000  |
| C | 1.55700000   | -1.31200000 | 5.71200000  |
| C | 3.02200000   | -1.70800000 | 5.49800000  |
| C | -0.63600000  | -1.96700000 | 5.10700000  |
| O | -2.45400000  | -1.64400000 | 6.65600000  |
| O | -0.59500000  | -1.22600000 | 8.77000000  |
| O | 1.96400000   | -0.24700000 | 7.80100000  |
| O | 0.74300000   | -2.26000000 | 5.05700000  |
| O | 3.28900000   | -2.93400000 | 6.13000000  |
| H | -0.95700000  | -2.99500000 | 6.95000000  |
| H | -0.50300000  | 0.00700000  | 7.16200000  |
| H | 1.51400000   | -2.22200000 | 7.67100000  |
| H | 1.36100000   | -0.32400000 | 5.29100000  |
| H | 3.69200000   | -0.95900000 | 5.91800000  |
| H | 3.26200000   | -1.82400000 | 4.44000000  |
| H | -0.83600000  | -1.00800000 | 4.63000000  |
| H | -1.25500000  | -0.58100000 | 8.98900000  |
| H | 2.20300000   | -0.54700000 | 8.66700000  |
| H | 4.20300000   | -3.12900000 | 5.97100000  |
| C | -3.12500000  | -2.41200000 | 7.62800000  |
| C | -4.56400000  | -1.92000000 | 7.81700000  |
| C | -5.43700000  | -2.19300000 | 6.59100000  |
| N | -6.83600000  | -1.97400000 | 6.94000000  |
| C | -5.06700000  | -1.24400000 | 5.45100000  |
| C | -5.24800000  | -3.64400000 | 6.15300000  |
| O | -5.93000000  | -3.86500000 | 4.94400000  |
| C | -3.76200000  | -3.94800000 | 5.98100000  |

|   |             |             |             |
|---|-------------|-------------|-------------|
| O | -3.13200000 | -3.76200000 | 7.22600000  |
| C | -3.51200000 | -5.37600000 | 5.49300000  |
| H | -2.58600000 | -2.32500000 | 8.57100000  |
| H | -4.99600000 | -2.43400000 | 8.67500000  |
| H | -4.57200000 | -0.85600000 | 8.05500000  |
| H | -7.41500000 | -2.57800000 | 6.39200000  |
| H | -4.02800000 | -1.37600000 | 5.15000000  |
| H | -5.69400000 | -1.42500000 | 4.57700000  |
| H | -5.20300000 | -0.20600000 | 5.75200000  |
| H | -5.67300000 | -4.31600000 | 6.89800000  |
| H | -6.78300000 | -4.21200000 | 5.17200000  |
| H | -3.34500000 | -3.24500000 | 5.26400000  |
| H | -3.98700000 | -5.54500000 | 4.52700000  |
| H | -2.44500000 | -5.56700000 | 5.38300000  |
| H | -3.91400000 | -6.10300000 | 6.19800000  |
| H | -6.97200000 | -2.17200000 | 7.91100000  |
| O | -0.76000000 | -8.87900000 | -3.98300000 |

Table S4: Cartesian coordinates for V<sub>D</sub>-Ala complex

|   | <u><u>x</u></u> | <u><u>y</u></u> | <u><u>z</u></u> |
|---|-----------------|-----------------|-----------------|
| H | -3.23000000     | -5.21300000     | 2.24900000      |
| H | -3.60800000     | -6.88700000     | 2.65600000      |
| H | -4.91100000     | -5.74000000     | 2.34600000      |
| H | -4.57500000     | -7.21300000     | 0.34800000      |
| H | -3.72600000     | -4.93200000     | -0.97400000     |
| O | -1.58700000     | -6.87900000     | 0.97500000      |
| O | -2.27900000     | -7.09700000     | -1.06100000     |
| C | -2.47200000     | -6.82700000     | 0.12400000      |
| C | -3.90900000     | -6.04000000     | 2.04000000      |
| C | -3.87900000     | -6.40700000     | 0.55700000      |
| N | -4.31200000     | -5.28600000     | -0.24900000     |
| H | -6.42800000     | -4.83800000     | -2.63200000     |
| H | -4.71400000     | -4.42600000     | -2.66400000     |
| H | -5.92000000     | -3.22400000     | -3.12400000     |
| H | -5.05800000     | -2.78500000     | -0.79100000     |
| H | -7.85700000     | -3.58400000     | -0.33300000     |
| O | -6.32700000     | -5.10500000     | 0.81600000      |
| C | -5.52100000     | -4.74000000     | -0.03100000     |
| C | -5.70900000     | -4.04200000     | -2.43700000     |
| C | -5.79600000     | -3.57200000     | -0.97900000     |
| N | -7.12700000     | -3.03100000     | -0.73500000     |
| O | -6.45100000     | -1.05100000     | -1.59000000     |
| C | -7.32300000     | -1.75300000     | -1.10100000     |
| C | -8.74500000     | -1.21200000     | -0.86300000     |

|    |             |              |             |
|----|-------------|--------------|-------------|
| H  | -8.92900000 | -1.14500000  | 0.18900000  |
| H  | -8.83600000 | -0.24100000  | -1.30300000 |
| H  | -9.45800000 | -1.87400000  | -1.30800000 |
| N  | -3.38600000 | -11.86300000 | -0.17800000 |
| C  | -2.78200000 | -12.15600000 | 1.11600000  |
| C  | -2.79600000 | -10.65900000 | -0.75200000 |
| C  | -1.28700000 | -10.83300000 | -0.93600000 |
| O  | -0.82800000 | -11.67700000 | -1.69500000 |
| C  | -3.40500000 | -10.31500000 | -2.11000000 |
| C  | -4.92700000 | -10.19300000 | -2.05900000 |
| C  | -5.35800000 | -9.01500000  | -1.18700000 |
| C  | -5.49100000 | -10.04500000 | -3.47300000 |
| H  | -3.22600000 | -12.66500000 | -0.82200000 |
| H  | -3.23700000 | -13.05800000 | 1.52500000  |
| H  | -1.71100000 | -12.31000000 | 0.98200000  |
| H  | -2.95500000 | -11.31600000 | 1.78800000  |
| H  | -2.97500000 | -9.84200000  | -0.05500000 |
| H  | -3.13300000 | -11.09000000 | -2.82700000 |
| H  | -2.97500000 | -9.38300000  | -2.47800000 |
| H  | -5.32500000 | -11.10800000 | -1.62000000 |
| H  | -5.00000000 | -8.07400000  | -1.60600000 |
| H  | -6.44400000 | -8.95900000  | -1.11800000 |
| H  | -4.96000000 | -9.11200000  | -0.17700000 |
| H  | -5.11300000 | -9.14100000  | -3.94900000 |
| H  | -5.21000000 | -10.89600000 | -4.09400000 |
| H  | -6.57900000 | -9.98700000  | -3.45300000 |
| N  | -0.54900000 | -9.98300000  | -0.19800000 |
| C  | 0.89700000  | -10.07300000 | -0.31800000 |
| C  | 1.42700000  | -8.95900000  | -1.24400000 |
| O  | 2.44200000  | -9.14200000  | -1.90600000 |
| C  | 1.56200000  | -10.09900000 | 1.06700000  |
| O  | 1.16300000  | -11.25100000 | 1.76500000  |
| C  | 1.17700000  | -8.89300000  | 1.85900000  |
| C  | 2.03000000  | -7.73400000  | 1.85500000  |
| C  | -0.07200000 | -8.86700000  | 2.58200000  |
| C  | 1.59200000  | -6.53800000  | 2.51300000  |
| C1 | 2.60200000  | -5.13500000  | 2.49000000  |
| C  | -0.49900000 | -7.66000000  | 3.24400000  |
| C  | 0.31700000  | -6.47800000  | 3.16700000  |
| O  | -0.15600000 | -5.24000000  | 3.60000000  |
| H  | -0.98100000 | -9.31000000  | 0.40200000  |
| H  | 1.09400000  | -11.02200000 | -0.81900000 |
| H  | 2.64700000  | -10.13300000 | 0.96600000  |
| H  | 1.60800000  | -11.23000000 | 2.60200000  |
| H  | 2.98000000  | -7.75800000  | 1.34300000  |
| H  | -0.70000000 | -9.74500000  | 2.60800000  |
| H  | -1.44700000 | -7.62900000  | 3.76100000  |

|   |             |             |             |
|---|-------------|-------------|-------------|
| N | 0.71300000  | -7.80600000 | -1.28100000 |
| C | 1.21300000  | -6.79600000 | -2.20600000 |
| C | 1.10600000  | -5.35800000 | -1.67600000 |
| O | 2.09600000  | -4.72200000 | -1.33100000 |
| C | 0.42700000  | -6.89500000 | -3.51300000 |
| C | 0.42200000  | -8.33600000 | -4.02500000 |
| O | 1.44000000  | -8.88700000 | -4.42600000 |
| H | -0.12300000 | -7.64400000 | -0.75700000 |
| H | 2.25900000  | -7.02800000 | -2.39600000 |
| H | -0.60500000 | -6.57900000 | -3.35300000 |
| H | 0.85400000  | -6.24600000 | -4.27800000 |
| N | -0.15300000 | -4.88100000 | -1.67300000 |
| C | -0.35500000 | -3.50700000 | -1.23100000 |
| C | -1.51400000 | -2.86100000 | -2.00900000 |
| O | -2.51300000 | -3.48600000 | -2.34300000 |
| C | -0.59800000 | -3.35400000 | 0.25800000  |
| C | -1.22200000 | -2.17600000 | 0.78900000  |
| C | -1.45800000 | -1.98500000 | 2.21400000  |
| C | -1.07500000 | -3.06100000 | 3.10100000  |
| O | -1.33300000 | -3.00100000 | 4.45700000  |
| C | -0.45300000 | -4.26500000 | 2.61100000  |
| C | -0.21300000 | -4.37800000 | 1.17600000  |
| H | -0.91100000 | -5.49100000 | -1.90800000 |
| H | 0.56600000  | -2.98300000 | -1.48700000 |
| H | -1.56400000 | -1.42100000 | 0.09400000  |
| H | 0.26000000  | -5.26800000 | 0.79200000  |
| N | -1.28500000 | -1.55600000 | -2.25400000 |
| C | -2.30700000 | -0.76600000 | -2.90700000 |
| C | -1.92000000 | 0.72200000  | -2.94900000 |
| O | -0.75700000 | 1.02800000  | -3.16900000 |
| C | -2.74700000 | -1.17900000 | -4.27700000 |
| C | -4.13800000 | -1.45900000 | -4.44400000 |
| C | -4.71500000 | -1.70000000 | -5.71300000 |
| C | -3.87100000 | -1.71000000 | -6.86900000 |
| O | -4.41200000 | -1.96300000 | -8.11300000 |
| C | -2.45300000 | -1.45100000 | -6.74100000 |
| C | -1.89200000 | -1.18000000 | -5.43800000 |
| H | -0.42800000 | -1.13200000 | -1.96200000 |
| H | -3.13300000 | -0.91600000 | -2.22300000 |
| H | -4.77600000 | -1.45800000 | -3.57400000 |
| H | -5.34500000 | -2.11000000 | -8.02700000 |
| H | -1.81900000 | -1.45700000 | -7.61600000 |
| H | -0.83900000 | -0.96300000 | -5.33600000 |
| N | -2.89100000 | 1.65500000  | -2.74800000 |
| C | -4.31200000 | 1.44300000  | -2.47900000 |
| O | -2.02900000 | -0.82000000 | 2.79700000  |
| C | -2.25800000 | 1.37200000  | 1.64300000  |



|    |              |             |             |
|----|--------------|-------------|-------------|
| C  | -3.93600000  | -0.42600000 | 1.33200000  |
| C  | -2.74500000  | 0.05400000  | 1.96600000  |
| C  | -4.07000000  | 1.62700000  | -0.06400000 |
| C  | -2.91700000  | 2.15900000  | 0.62500000  |
| C  | -4.60100000  | 0.34900000  | 0.32800000  |
| C  | -4.69400000  | 2.29200000  | -1.26400000 |
| Cl | -4.55800000  | -1.98400000 | 1.75500000  |
| O  | -5.04200000  | 2.67300000  | -4.44900000 |
| C  | -5.14900000  | 1.67100000  | -3.75100000 |
| O  | -4.25700000  | 3.62400000  | -1.41700000 |
| H  | -2.59000000  | 2.60900000  | -2.78300000 |
| H  | -4.46300000  | 0.40400000  | -2.21400000 |
| H  | -1.38000000  | 1.74800000  | 2.14200000  |
| H  | -2.53100000  | 3.13400000  | 0.36200000  |
| H  | -5.48000000  | -0.03900000 | -0.15500000 |
| H  | -5.77600000  | 2.26800000  | -1.15800000 |
| H  | -4.66800000  | 4.25600000  | -0.68600000 |
| N  | -5.97700000  | 0.62600000  | -3.97700000 |
| O  | -5.58200000  | -4.21800000 | -6.36900000 |
| C  | -6.55800000  | -3.28200000 | -6.09200000 |
| C  | -6.17900000  | -1.94500000 | -5.77200000 |
| C  | -7.93600000  | -3.66900000 | -6.11900000 |
| C  | -8.95700000  | -2.70500000 | -5.83200000 |
| O  | -10.28700000 | -3.07400000 | -5.85400000 |
| C  | -8.58600000  | -1.35600000 | -5.51500000 |
| C  | -7.19500000  | -0.94800000 | -5.47600000 |
| C  | -6.83800000  | 0.50800000  | -5.12300000 |
| C  | -8.05900000  | 1.40100000  | -4.81900000 |
| O  | -8.62700000  | 1.96300000  | -5.75400000 |
| O  | -8.41400000  | 1.52000000  | -3.64100000 |
| H  | -5.97500000  | -0.12600000 | -3.32400000 |
| H  | -6.23600000  | 0.93300000  | -5.92100000 |
| H  | -4.72800000  | -3.81200000 | -6.30700000 |
| H  | -8.18500000  | -4.69700000 | -6.32800000 |
| H  | -10.82600000 | -2.32400000 | -5.64100000 |
| H  | -9.35500000  | -0.63600000 | -5.27800000 |
| C  | -1.08900000  | -1.98300000 | 6.56800000  |
| C  | -0.26500000  | -1.02300000 | 7.41900000  |
| C  | 1.22200000   | -1.28100000 | 7.20500000  |
| C  | 1.55700000   | -1.31200000 | 5.71200000  |
| C  | 3.02200000   | -1.70800000 | 5.49800000  |
| C  | -0.63600000  | -1.96700000 | 5.10700000  |
| O  | -2.45400000  | -1.64400000 | 6.65600000  |
| O  | -0.59500000  | -1.22600000 | 8.77000000  |
| O  | 1.96400000   | -0.24700000 | 7.80100000  |
| O  | 0.74300000   | -2.26000000 | 5.05700000  |
| O  | 3.28900000   | -2.93400000 | 6.13000000  |

|   |             |             |             |
|---|-------------|-------------|-------------|
| H | -0.95700000 | -2.99500000 | 6.95000000  |
| H | -0.50300000 | 0.00700000  | 7.16200000  |
| H | 1.51400000  | -2.22200000 | 7.67100000  |
| H | 1.36100000  | -0.32400000 | 5.29100000  |
| H | 3.69200000  | -0.95900000 | 5.91800000  |
| H | 3.26200000  | -1.82400000 | 4.44000000  |
| H | -0.83600000 | -1.00800000 | 4.63000000  |
| H | -1.25500000 | -0.58100000 | 8.98900000  |
| H | 2.20300000  | -0.54700000 | 8.66700000  |
| H | 4.20300000  | -3.12900000 | 5.97100000  |
| C | -3.12500000 | -2.41200000 | 7.62800000  |
| C | -4.56400000 | -1.92000000 | 7.81700000  |
| C | -5.43700000 | -2.19300000 | 6.59100000  |
| N | -6.83600000 | -1.97400000 | 6.94000000  |
| C | -5.06700000 | -1.24400000 | 5.45100000  |
| C | -5.24800000 | -3.64400000 | 6.15300000  |
| O | -5.93000000 | -3.86500000 | 4.94400000  |
| C | -3.76200000 | -3.94800000 | 5.98100000  |
| O | -3.13200000 | -3.76200000 | 7.22600000  |
| C | -3.51200000 | -5.37600000 | 5.49300000  |
| H | -2.58600000 | -2.32500000 | 8.57100000  |
| H | -4.99600000 | -2.43400000 | 8.67500000  |
| H | -4.57200000 | -0.85600000 | 8.05500000  |
| H | -7.41500000 | -2.57800000 | 6.39200000  |
| H | -4.02800000 | -1.37600000 | 5.15000000  |
| H | -5.69400000 | -1.42500000 | 4.57700000  |
| H | -5.20300000 | -0.20600000 | 5.75200000  |
| H | -5.67300000 | -4.31600000 | 6.89800000  |
| H | -6.78300000 | -4.21200000 | 5.17200000  |
| H | -3.34500000 | -3.24500000 | 5.26400000  |
| H | -3.98700000 | -5.54500000 | 4.52700000  |
| H | -2.44500000 | -5.56700000 | 5.38300000  |
| H | -3.91400000 | -6.10300000 | 6.19800000  |
| H | -6.97200000 | -2.17200000 | 7.91100000  |
| O | -0.76000000 | -8.87900000 | -3.98300000 |
